# Supplementary material for: Microfluidic-Based Formulation of Essential Oils-Loaded Chitosan Coated PLGA Particles Enhances Their Bioavailability and Nematocidal Activity
Source: MDPI journal article supplement (doi:10.3390/pharmaceutics14102030), 2022-09-23
Supplement: s1 [file s1]

## Supplementary Materials:

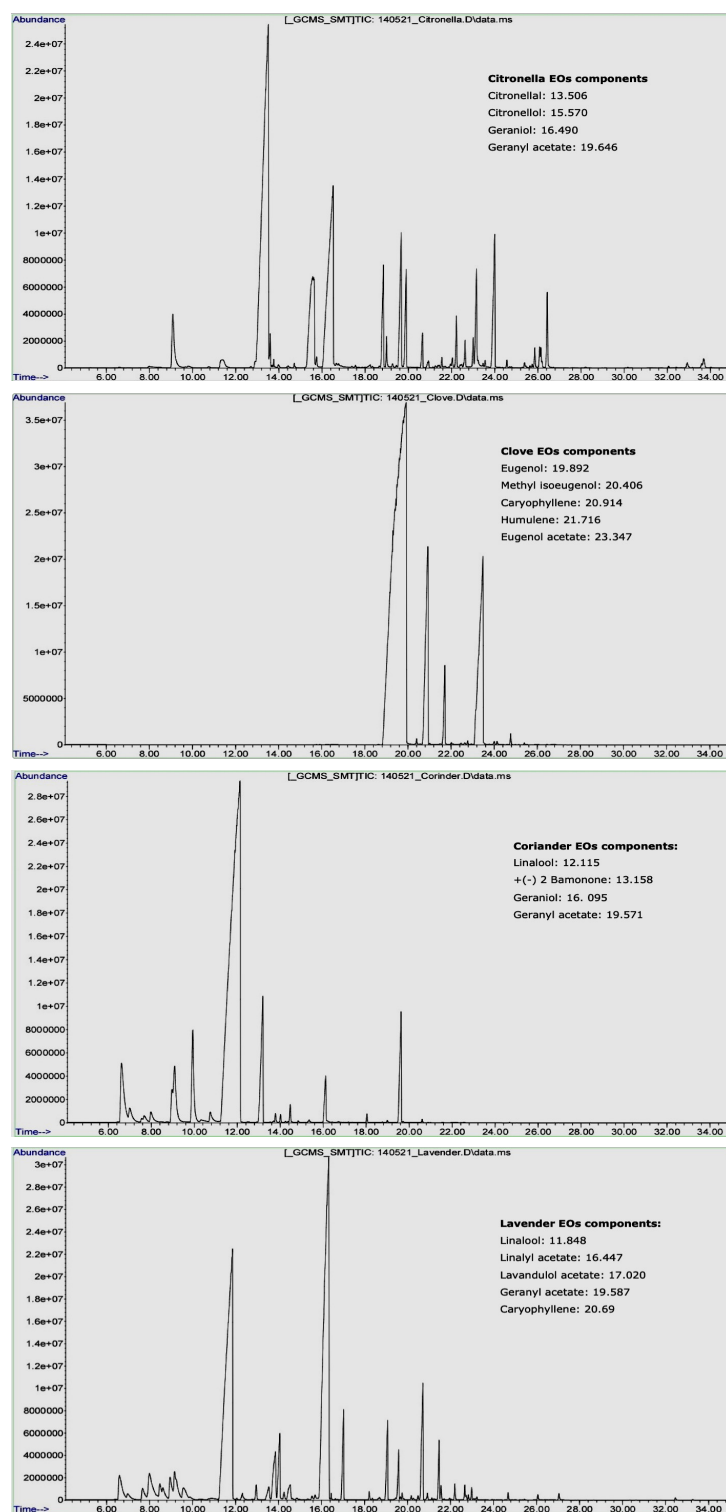

**Figure S1.** Representative gas chromatograms of crude oils of citronella, clove, coriander, and lavenders showing the retention times of the major constituents.

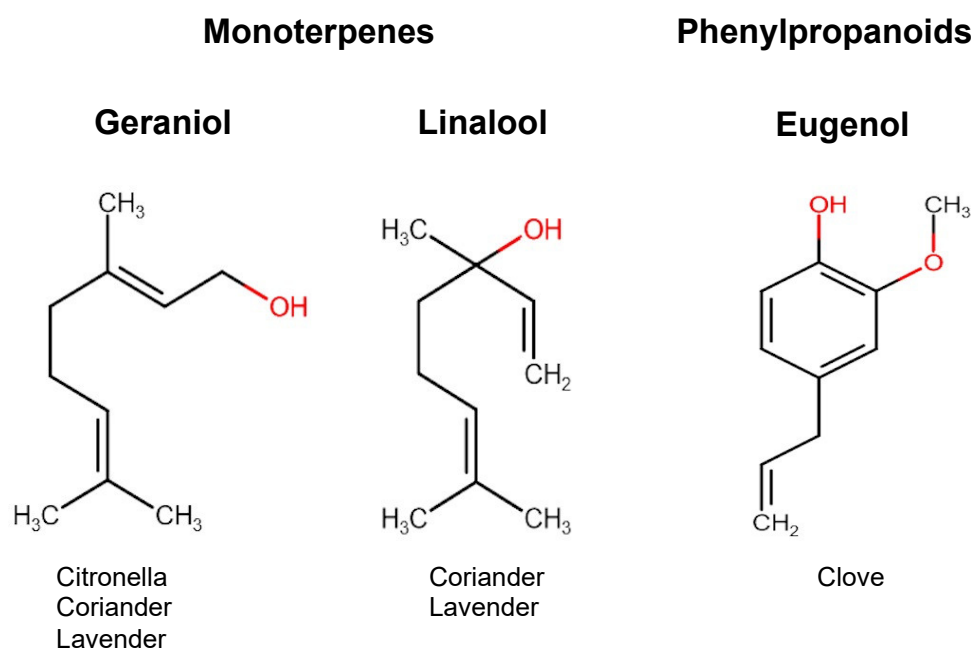

**Figure S2.** The chemical structure of geraniol, linalool, and eugenol used in the study.

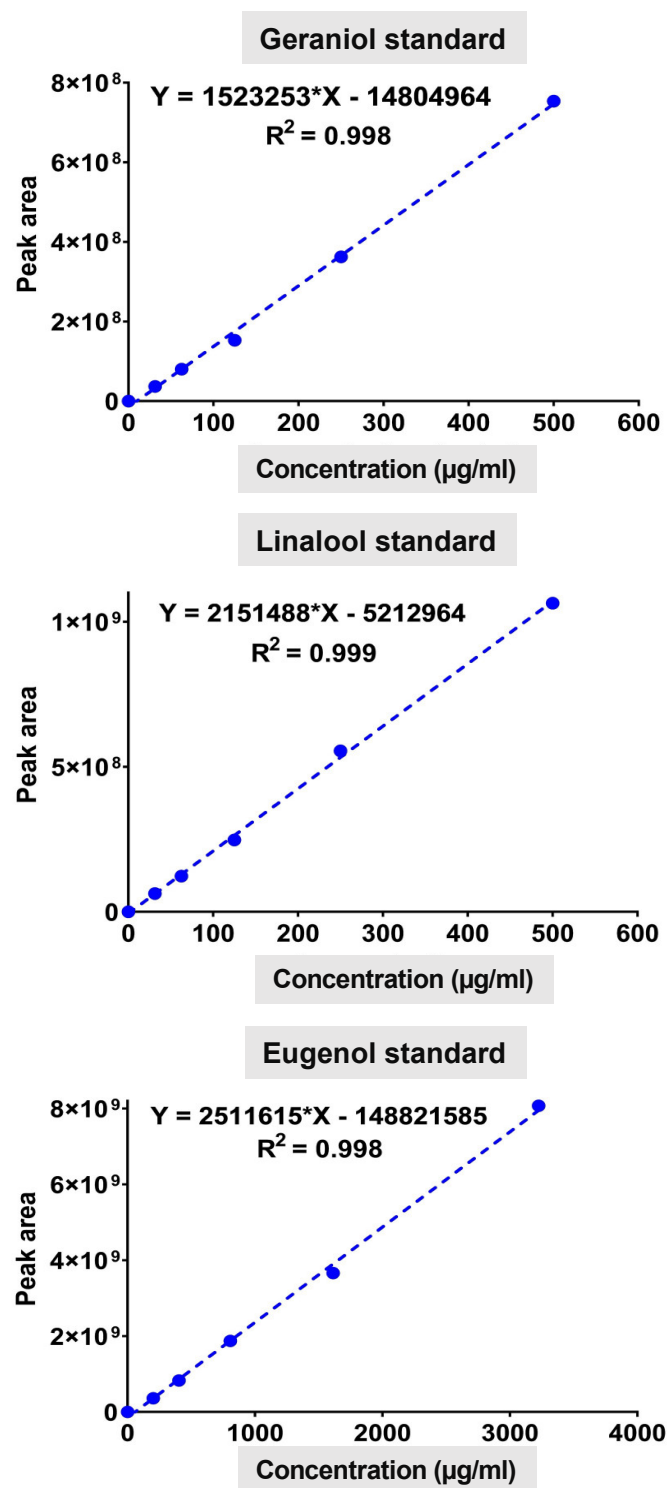

**Figure S3.** GC/MS calibration curves used for quantification of three essential oil (EO) components (geraniol, linalool and eugenol) in crude EOs, working solutions and encapsulated particles.

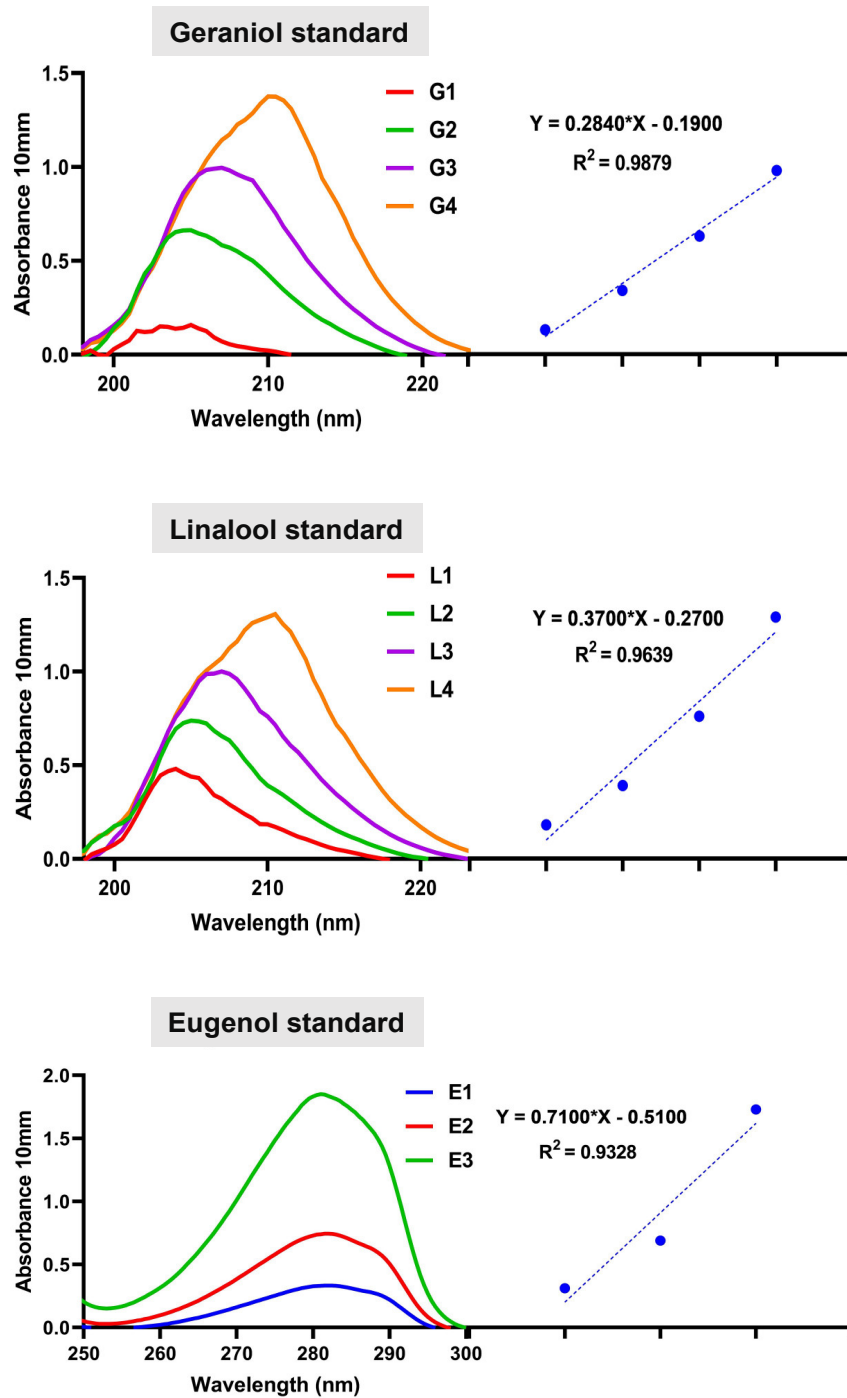

**Figure S4.** Calibration curves for UV-vis spectrophotometric determination of the release kinetics of essential oil components from uncoated and coated encapsulated PLGA particles.

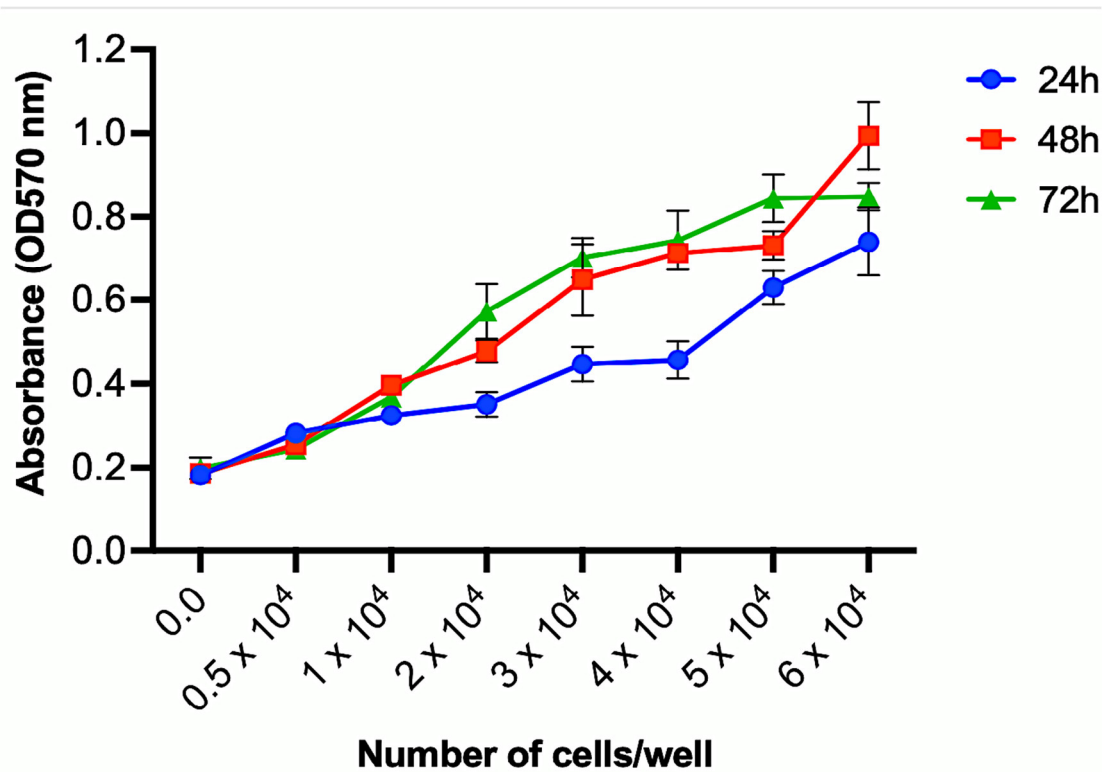

**Figure S5. Optimization of cell seeding density.** FKD-1-R cells were seeded at different densities  $0.5$ ,  $1$ ,  $2$ ,  $3$ ,  $4$ ,  $5$  and  $6 \times 10^4$  cells/well of 96-well tissue culture microtiter plates. After 24, 48 and 72 h, cell viability was measured by the MTT assay. A seeding density  $2 \times 10^4$  cells/well was chosen because higher seeding densities did not result in any discernible cell growth at 48 and 72 h.

**Table S1.** Optimization of PLGA particle formulation based on the average size and polydispersity index (PDI) at different conditions including essential oil (EO) components' concentration (%), polymer PLGA concentration (%) and the solvent used (acetone or DCM, or DCM and acetone at a ratio of 1:10 and 1:20).

| Formulation | EO concentration (%) | PLGA concentration (%) | Solvent used | Average size (nm) | PDI  |
|-------------|----------------------|------------------------|--------------|-------------------|------|
| F1          | 0.25                 | 1                      | Acetone      | 131.5 ± 18.2      | 0.23 |
| F2          | 0.25                 | 2                      | Acetone      | 189.8 ± 51.1      | 0.30 |
| F3          | 0.50                 | 1                      | Acetone      | 133.6 ± 98.7      | 0.32 |
| F4          | 0.50                 | 2                      | Acetone      | 192.9 ± 133.6     | 0.24 |
| F5          | 1.00                 | 1                      | Acetone      | 158.3 ± 9.8       | 0.20 |
| F6          | 1.00                 | 2                      | Acetone      | 211.3 ± 70.9      | 0.32 |
| F7          | 0.25                 | 1                      | DCM          | 448 ± 205.0       | 0.26 |
| F8          | 0.25                 | 2                      | DCM          | 525.6 ± 170.6     | 0.34 |
| F9          | 0.50                 | 1                      | DCM          | 537.5 ± 98.7      | 0.42 |
| F10         | 0.50                 | 2                      | DCM          | 554.8 ± 219.7     | 0.34 |
| F11         | 1.00                 | 1                      | DCM          | 742.2 ± 127.4     | 0.63 |
| F12         | 1.00                 | 2                      | DCM          | 751.1 ± 66.3      | 0.45 |
| F13         | 0.50                 | 1                      | 1:10         | 296.3 ± 111.7     | 0.23 |
| F14         | 0.50                 | 2                      | 1:10         | 301.5 ± 151.4     | 0.23 |
| F15         | 0.50                 | 1                      | 1:20         | 313.6 ± 201.3     | 0.25 |
| F16         | 0.50                 | 2                      | 1:20         | 361.0 ± 134.1     | 0.23 |

**Table S2.** The half maximal inhibitory concentrations (IC<sub>50</sub>) of the essential oil (EO) (μg/mL) in loaded PLGA particles, chitosan-coated PLGA particles and free EO components.

| Particle/EO | Geraniol    | Linalool    | Eugenol     | Combined    |
|-------------|-------------|-------------|-------------|-------------|
| PLGA        | 7.47 ± 0.43 | 3.92 ± 0.51 | 2.78 ± 0.55 | 1.47 ± 0.61 |
| CS-PLGA     | 3.91 ± 0.51 | 0.91 ± 0.56 | 1.48 ± 0.49 | 0.74 ± 0.62 |
| Free EOs    | 1.65 ± 0.79 | 0.67 ± 0.44 | 1.07 ± 0.83 | 0.58 ± 0.31 |
